# Supplementary material for: Determination of ammonium in natural water using a quinoline-based o-dialdehyde fluorescent reagent with visible excitation wavelength
Source: Royal Society of Chemistry journal article supplement (doi:10.1039/d1ay01462e), 2021-01-01
Supplement: d1ay01462e1.pdf [file d1ay01462e1.pdf]

## Supplementary Information

### Determination of ammonium in natural water using a quinoline- based *o*-dialdehyde fluorescent reagent with visible excitation wavelength

Xuejia Chen, Tingkai Xiong, Jin Xu, Yan Li, Min Zhang\*, Ying Liang\*

School of Life and Environmental Sciences, Guilin University of Electronic Technology, Guilin,

Guangxi, 541004, China

\* Corresponding authors.

Email address:

[liangyi0774@guet.edu.cn](mailto:liangyi0774@guet.edu.cn) (Y. Liang);

[zhangmin@guet.edu.cn](mailto:zhangmin@guet.edu.cn) (M. Zhang);

(1) Characterization of compound 1 and 2 by gas chromatography - mass spectrometry

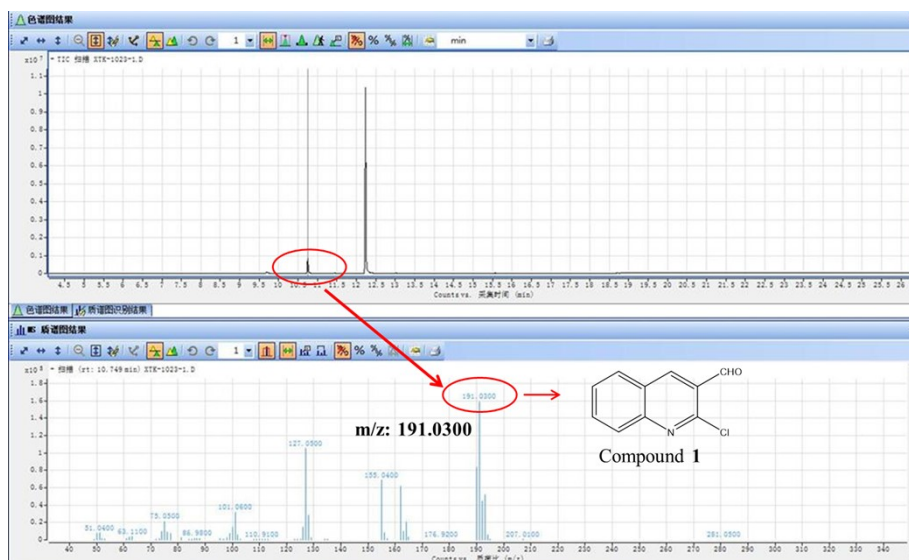

Fig. S1. Separation of Compound 1 by GC - MS

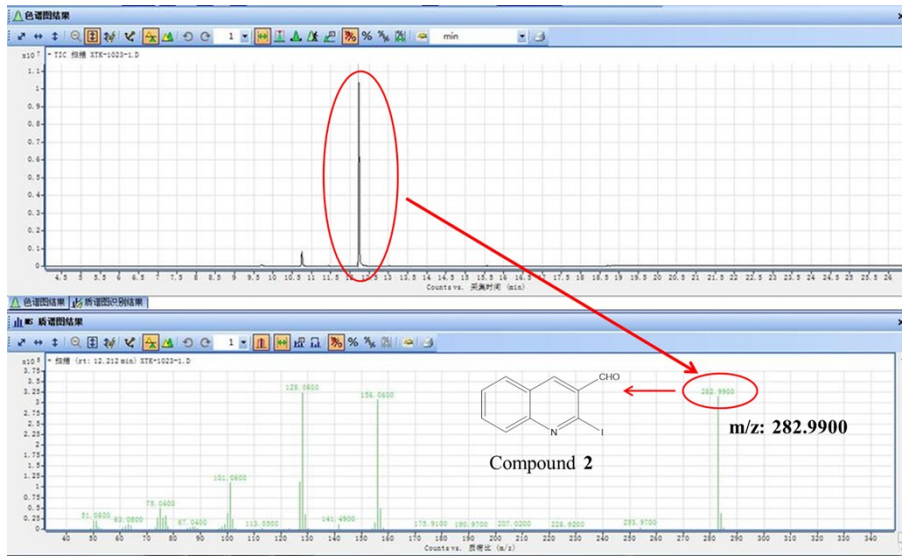

Fig. S2. Separation of Compound 2 by GC - MS

## (2) Characterization of compound 3 and 4 and QDA by nuclear magnetic resonance (NMR) spectroscopy

The NMR results are shown below. Fig. S3 shows the NMR spectrum of compound 3.

$^1\text{H}$  NMR (400 MHz, Chloroform- $d$ )  $\delta$  8.20 (s, 1H), 8.07 (d,  $J = 8.4$  Hz, 1H), 7.84 (d,  $J = 9.0$  Hz, 1H), 7.74 – 7.71 (m, 1H), 7.59-7.56 (m, 1H), 6.05 (s, 1H), 4.21 – 4.13 (m, 4H).

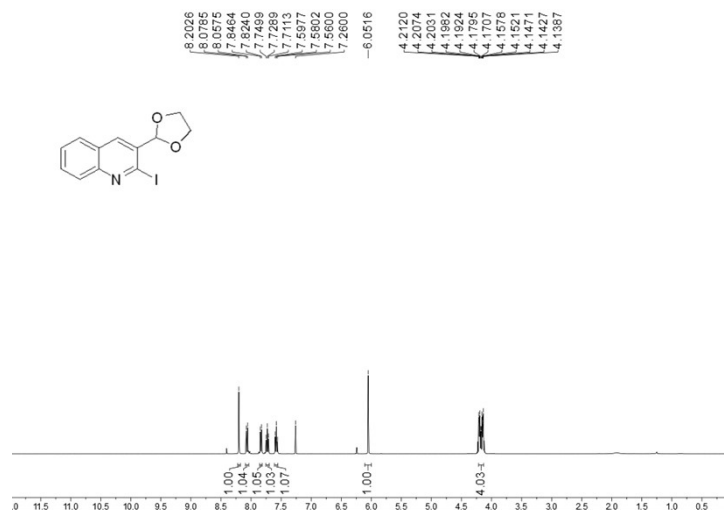

$^1\text{H}$  NMR (400 MHz, Chloroform- $d$ )  $\delta$  10.97 (s, 1H), 10.36 (s, 1H), 8.82 (s, 1H), 8.30 (d,  $J$  = 8.5 Hz, 1H), 8.04 (d,  $J$  = 8.2 Hz, 1H), 7.98-7.93 (m, 1H), 7.76-7.80 (m, 1H).

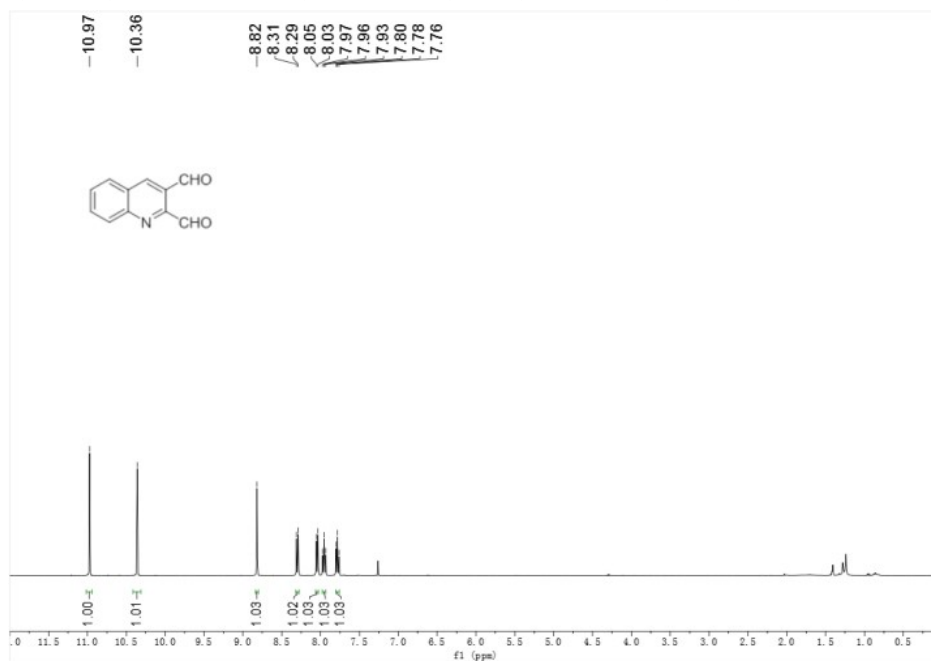

**Fig. S5.** The NMR spectrum of quinoline-2,3-dialdehyde

### (3) Characterization of blank and QDA - $\text{NH}_4^+$ - $\text{SO}_3^{2-}$ product by HPLC-MS

HLB SPE cartridge was used to extract the QDA product from water, then the HLB cartridge was eluted with methanol and the eluted fraction was injected into a HPLC-MS. The corresponding HPLC-MS results of blank and product are as following:

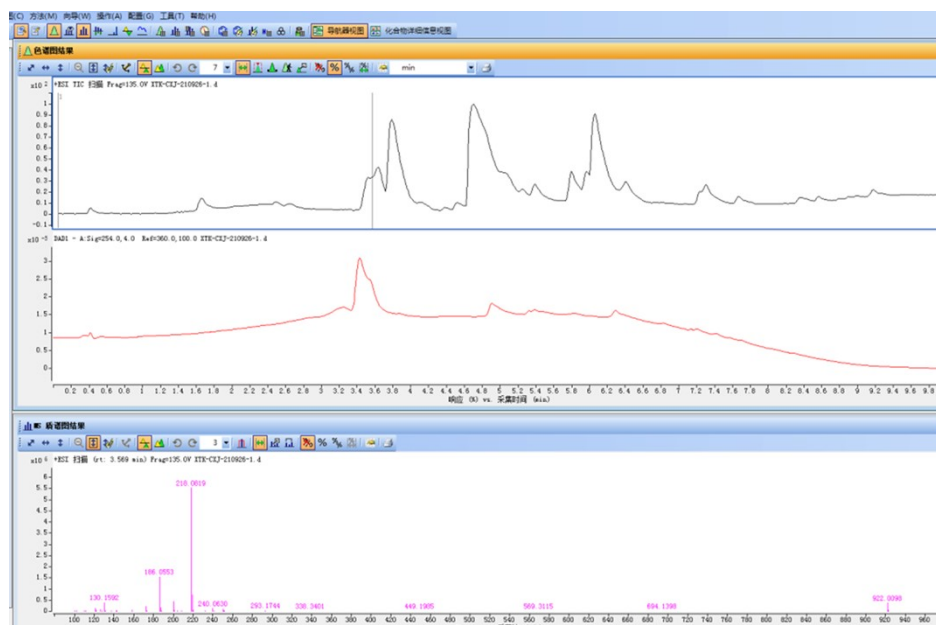

Fig. S6. Characterization of blank (QDA -  $\text{SO}_3^{2-}$ ) by HPLC-MS

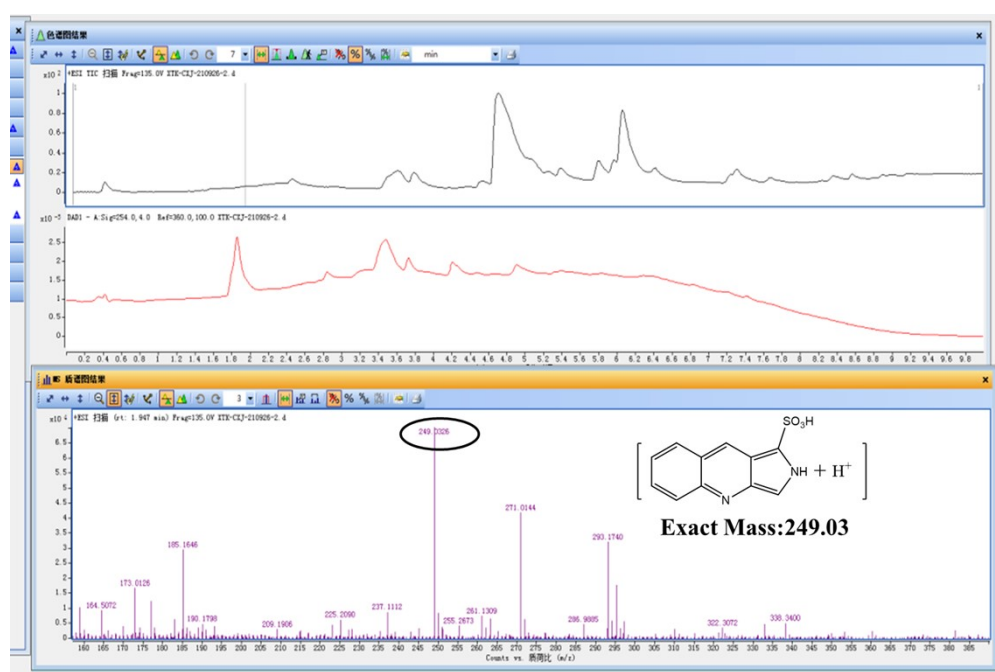

Fig. S7. Characterization of QDA -  $\text{NH}_4^+$  -  $\text{SO}_3^{2-}$  product by HPLC-MS

(4) Excitation and emission spectra of fluorescence products added with different concentrations of QDA

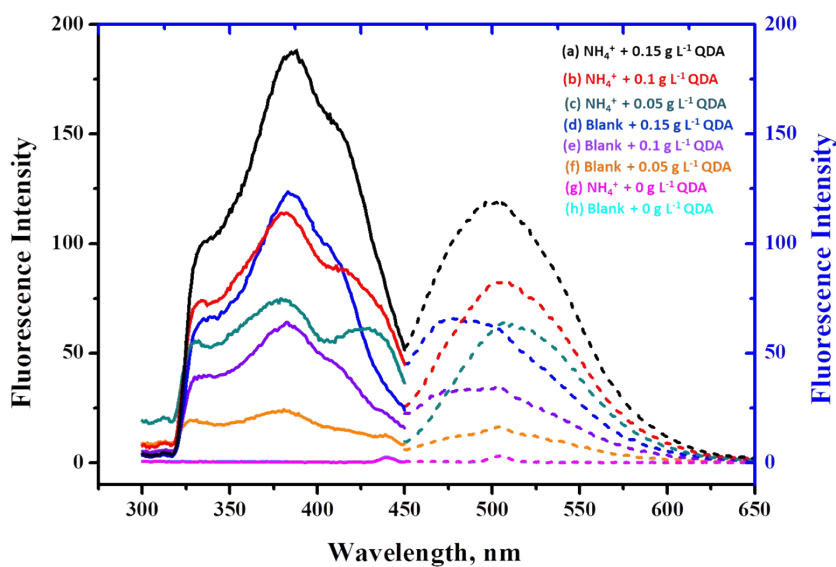

**Fig. S8.** Excitation (solid line) and emission (dash line) spectra of the fluorescence products with 0/0.05/0.1/0.15 g L<sup>-1</sup> added to the solution.

NH<sub>4</sub><sup>+</sup> concentration: 1.5 μmol L<sup>-1</sup>; Na<sub>2</sub>SO<sub>3</sub> concentration: 0.0315 g L<sup>-1</sup>; Na<sub>2</sub>B<sub>4</sub>O<sub>7</sub> buffer concentration: 3.0 g L<sup>-1</sup>; pH: 9.4. Reaction time: 50 min; Reaction temperature: 50 °C

(5) Excitation and emission spectra of fluorescence products added with different concentrations of  $\text{Na}_2\text{SO}_3$

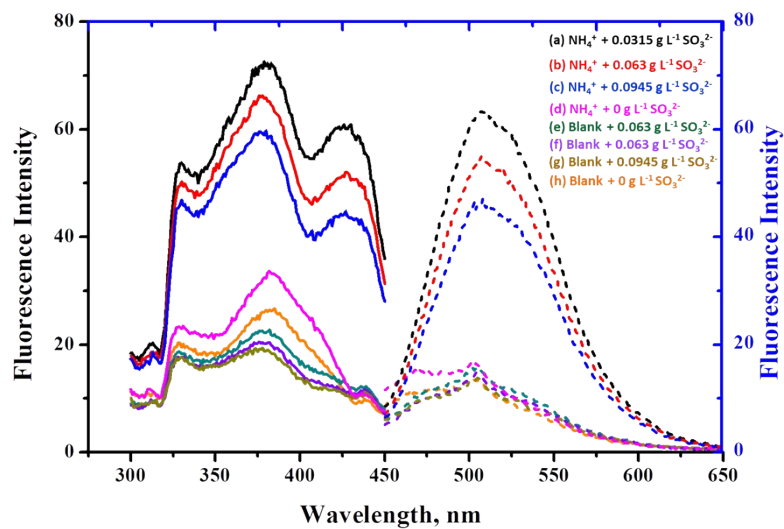

**Fig. S9.** Excitation (solid line) and emission (dash line) spectra of the fluorescence products with 0/0.0315/0.063/0.0945 g L<sup>-1</sup> added to the solution.

$\text{NH}_4^+$  concentration: 1.5  $\mu\text{mol L}^{-1}$ ; QDA concentration: 0.083 g L<sup>-1</sup>;  $\text{Na}_2\text{B}_4\text{O}_7$  buffer concentration: 3.0 g L<sup>-1</sup>; pH: 9.4. Reaction time: 50 min; Reaction temperature: 50°C.



(6) Emission spectra of fluorescence products which without calcium ions

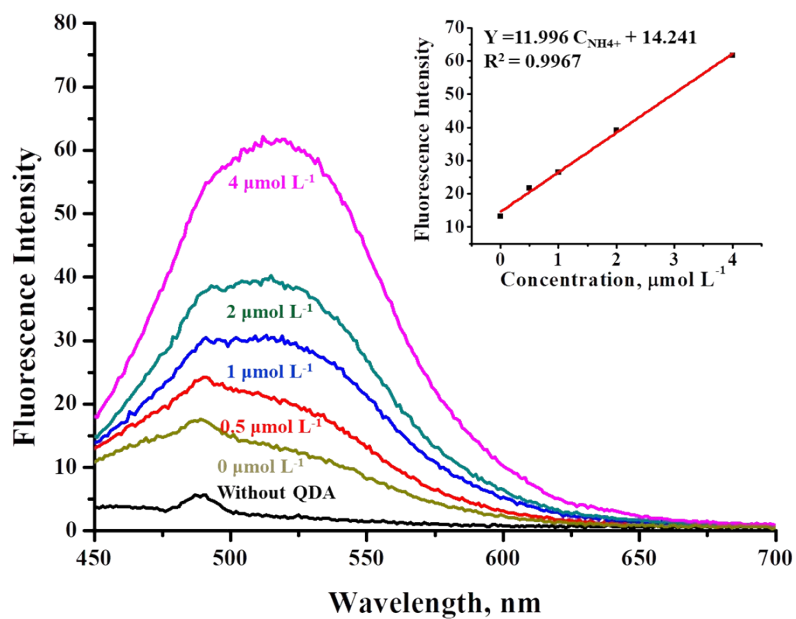

Fig. S10. Emission spectra of the fluorescence products with 0/0.5/1/2/4  $\mu\text{mol L}^{-1}$   $\text{NH}_4^+$ .

QDA concentration :0.083  $\text{g L}^{-1}$ ;  $\text{Na}_2\text{SO}_3$  concentration: 0.0315  $\text{g L}^{-1}$ ;  $\text{Na}_2\text{B}_4\text{O}_7$  buffer

concentration: 3.0  $\text{g L}^{-1}$ ; pH: 9.4. Reaction time: 30 min; Reaction temperature: 40°C.

(7) Effects of inorganic ions on measuring ammonium solution

Table S1 Effects of Inorganic ions on measuring ammonium solution (3  $\mu\text{mol L}^{-1}$ ).

| Ion                 | Concentration, $\mu\text{mol L}^{-1}$ | Relative sensitivity to ammonium, % |
|---------------------|---------------------------------------|-------------------------------------|
| $\text{NH}_4^+$     | 3                                     | $100.0 \pm 2.5$                     |
| $\text{Sr}^{2+}$    | 60                                    | $101.2 \pm 0.8$                     |
|                     | 120                                   | $102.4 \pm 0.5$                     |
| $\text{Ni}^{2+}$    | 0.5                                   | $106.1 \pm 1.4$                     |
|                     | 1.5                                   | $104.2 \pm 0.3$                     |
| $\text{Ba}^{2+}$    | 3                                     | $103.2 \pm 0.5$                     |
|                     | 6                                     | $104.0 \pm 0.1$                     |
| $\text{Zn}^{2+}$    | 0.5                                   | $106.1 \pm 4.0$                     |
|                     | 1.5                                   | $100.5 \pm 1.2$                     |
| $\text{Cd}^{2+}$    | 3                                     | $101.4 \pm 0.2$                     |
|                     | 6                                     | $101.1 \pm 0.5$                     |
| $\text{Co}^{2+}$    | 0.5                                   | $103.8 \pm 1.1$                     |
|                     | 1.5                                   | $82.1 \pm 3.7$                      |
| $\text{Mg}^{2+}$    | 100                                   | $103.6 \pm 0.2$                     |
|                     | 2000                                  | $109.0 \pm 0.4$                     |
|                     | 4000                                  | $114.5 \pm 1.0$                     |
| $\text{K}^+$        | 50                                    | $98.1 \pm 0.2$                      |
|                     | 100                                   | $98.6 \pm 0.3$                      |
|                     | 200                                   | $100.4 \pm 0.5$                     |
| $\text{Fe}^{3+}$    | 30                                    | $101.2 \pm 0.3$                     |
| $\text{Na}^+$       | 30                                    | $101.9 \pm 0.4$                     |
| $\text{HPO}_4^{2-}$ | 30                                    | $101.3 \pm 0.2$                     |
| $\text{NO}_3^-$     | 30                                    | $99.6 \pm 0.8$                      |

**(8) Calibration curves of different times**

**Table S2** Calibration curves of different times

| Serial number | Calibration curve                                     | R <sup>2</sup> |
|---------------|-------------------------------------------------------|----------------|
| 1             | $FI=(31.012 \pm 0.77) C_{NH_4^+} + (13.879 \pm 2.79)$ | 0.995          |
| 2             | $FI=(34.233 \pm 0.37) C_{NH_4^+} + (11.409 \pm 0.31)$ | 0.9997         |
| 3             | $FI=(30.671 \pm 0.37) C_{NH_4^+} + (10.984 \pm 1.26)$ | 0.9994         |
| 4             | $FI=(29.89 \pm 4.18) C_{NH_4^+} + (16.52 \pm 1.24)$   | 0.9931         |
| 5             | $FI=(31.501 \pm 0.88) C_{NH_4^+} + (23.704 \pm 2.22)$ | 0.9977         |
| 6             | $FI=(32.072 \pm 1.24) C_{NH_4^+} + (16.996 \pm 3.13)$ | 0.9955         |
| 7             | $FI=(29.611 \pm 0.10) C_{NH_4^+} + (34.742 \pm 4.60)$ | 0.9944         |
